# Supplementary material for: Vasorin is a potential serum biomarker and drug target of hepatocarcinoma screened by subtractive-EMSA-SELEX to clinic patient serum
Source: PubMed Central journal article supplement (PMC4496339; doi:10.18632/oncotarget.3541), 2015-03-12
Supplement: oncotarget-06-10045-s001.pdf [file oncotarget-06-10045-s001.pdf]

## Vasorin is a potential serum biomarker and drug target of hepatocarcinoma screened by subtractive-EMSA-SELEX to clinic patient serum

### Supplementary Material

**Table 1: Potential biomarkers identified by MS**

| GI           | Protein                      | Matched Peptides | Peptide                                                                                                                                | Proteins (GI) matching the same set of peptides                                                                                                           |
|--------------|------------------------------|------------------|----------------------------------------------------------------------------------------------------------------------------------------|-----------------------------------------------------------------------------------------------------------------------------------------------------------|
| gi 1620909   | Ceruloplasmin                | 5                | K.DIASGLIGPLIICK.K+ (C)<br>K.VNKDDEEFIESNK.M<br>K.DL YSGLIGPLIVCR.R+ (C)<br>K.LISVDTEHSNIYLQNGPDR.I<br>R.GPEEEHLGILGPVIWAEVGDIT<br>R.V | ceruloplasmin precursor or isoforms: (gi 4557485)<br>(gi 119599289)<br>(gi 119599290) (gi 126031006)<br>(gi 158255874) ( gi 221042622 )                   |
| gi 291922    | complement factor B          | 4                | K.VASYGVKPR.Y<br>K.VSEADSSNADWVTK.Q<br>R.DFHINLFQVLPWLK.E<br>K.EAGIPEFYDYDVALIK.L                                                      | Complement factor B preproprotein or Segment (gi 13278732) (gi 58176651)<br>(gi 67782358) (gi 134105218) (g i 194384366) (gi 239781743)<br>(gi 251837060) |
| gi 194384410 | unnamed protein product      | 3                | K.EYVLPSEFIVEPTEK.F<br>K.VQLSNDFDEYIMAIEQTIK.S<br>R.EPGQDLVVLPLSITTDIFIPFR.L                                                           | complement component C3 or precursor (gi 179665)<br>(gi 115298678)                                                                                        |
| gi 15489339  | VASN protein                 | 1                | R.LLLLDLSHNSLLALEPGILDTA<br>NVEALR.L                                                                                                   | CSRV314 or slit-like 2 precursor (gi 37181716) (gi 37181718 )<br>(gi 88702793 )                                                                           |
| gi 106529    | Ig kappa chain C region      | 1                | K.SGTASVVCLLNNFYPR.E+ (C)                                                                                                              | Immunoglobulin (gi 125145 )<br>(gi 184848 ) (gi 185925)<br>(gi 185927 ) (gi 185947)<br>(gi 185949 ) (gi 229526) etc                                       |
| gi 386789    | hemopexin precursor          | 3                | R.RLWWLDLK.S<br>R.YYCFQGNQFLR.F+ (C)<br>K.EVGTPHGIILDSVDAAFICPGS<br>SR.L+ (C)                                                          | hemopexin precursor or unnamed protein (gi 1335098)<br>(gi 11321561) (gi 189053897 )                                                                      |
| gi 51173528  | carboxypeptidase N precursor | 1                | K.TLNLAQNLLAQLPEELFHPLTS<br>LQTLK.L                                                                                                    | Carboxypeptidase N, polypeptide 2 (gi 52788240)<br>(gi 119598461) (gi 145207281 )<br>(gi 256217721)                                                       |

**Supplementary results Table 2:** The VASN level in 326 tested individuals for the ELISA analysis

| HCC     |              |          | Normal  |              | Hepatitis |              |
|---------|--------------|----------|---------|--------------|-----------|--------------|
| Case No | VASN (ng/ml) | AFP (TU) | Case No | VASN (ng/ml) | Case No   | VASN (ng/ml) |
| 1       | 14.70647     | 444.3    | 1       | 2.483388     | 1         | 9.044036     |
| 2       | 12.45442     | 1000     | 2       | 2.307037     | 2         | 4.607394     |
| 3       | 10.57283     | 830.8    | 3       | 2.203464     | 3         | 4.458231     |
| 4       | 8.350219     | 1000     | 4       | 2.169312     | 4         | 4.324461     |
| 5       | 6.863982     | 1000     | 5       | 2.135347     | 5         | 3.72238      |
| 6       | 6.448114     | 1000     | 6       | 2.085306     | 6         | 3.579855     |
| 7       | 6.345765     | 494.8    | 7       | 2.040221     | 7         | 3.47553      |
| 8       | 5.983209     | 4.6      | 8       | 2.03457      | 8         | 3.325962     |
| 9       | 5.967843     | 1.25     | 9       | 1.968317     | 9         | 3.147103     |
| 10      | 5.796683     | 1000     | 10      | 1.939469     | 10        | 2.930384     |
| 11      | 5.302034     | 34.21    | 11      | 1.870335     | 11        | 2.866855     |
| 12      | 4.994912     | 3.41     | 12      | 1.495186     | 12        | 2.866855     |
| 13      | 4.994912     | 3.41     | 13      | 1.465135     | 13        | 2.383298     |
| 14      | 4.994912     | 1000     | 14      | 1.385336     | 14        | 2.383298     |
| 15      | 4.76476      | 3.07     | 15      | 1.376101     | 15        | 2.341935     |
| 16      | 4.506769     | 2.51     | 16      | 1.376101     | 16        | 2.231864     |
| 17      | 4.385359     | 168      | 17      | 1.346795     | 17        | 2.203464     |
| 18      | 4.264199     | 0.819    | 18      | 1.33496      | 18        | 2.157976     |
| 19      | 4.264199     | 1000     | 19      | 1.309772     | 19        | 2.101568     |
| 20      | 4.22191      | 276.7    | 20      | 1.294024     | 20        | 2.067976     |
| 21      | 3.86626      | 1000     | 21      | 1.234208     | 21        | 1.908964     |
| 22      | 3.84211      | 1000     | 22      | 1.203065     | 22        | 1.891749     |
| 23      | 3.782062     | 1.52     | 23      | 1.174878     | 23        | 1.87461      |
| 24      | 3.722076     | 1.36     | 24      | 1.146878     | 24        | 1.82365      |
| 25      | 3.722076     | 1000     | 25      | 1.119064     | 25        | 1.805946     |
| 26      | 3.542495     | 1.7      | 26      | 1.114793     | 26        | 1.691109     |
| 27      | 3.482759     | 1000     | 27      | 0.98279      | 27        | 1.691109     |
| 28      | 3.423087     | 1.7      | 28      | 0.98279      | 28        | 1.642663     |
| 29      | 3.363476     | 4.22     | 29      | 0.957142     | 29        | 1.626667     |
| 30      | 3.155944     | 1000     | 30      | 0.929585     | 30        | 1.610747     |
| 31      | 3.108958     | 1000     | 31      | 0.906766     | 31        | 1.594903     |
| 32      | 3.068803     | 996.3    | 32      | 0.903262     | 32        | 1.579135     |
| 33      | 2.947        | 34.77    | 33      | 0.887882     | 33        | 1.532289     |
| 34      | 2.888846     | 0.766    | 34      | 0.881578     | 34        | 1.465135     |
| 35      | 2.864196     | 839.3    | 35      | 0.876        | 35        | 1.425648     |
| 36      | 2.787898     | 582.7    | 36      | 0.864193     | 36        | 1.381088     |
| 37      | 2.742125     | 1.49     | 37      | 0.851175     | 37        | 1.351762     |

|    |          |       |    |          |    |             |
|----|----------|-------|----|----------|----|-------------|
| 38 | 2.602019 | 1000  | 38 | 0.829232 | 38 | 1.32274     |
| 39 | 2.418728 | 5.16  | 39 | 0.825412 | 39 | 1.32274     |
| 40 | 2.3497   | 1000  | 40 | 0.806014 | 40 | 1.25999796  |
| 41 | 2.210712 | 18.28 | 41 | 0.780826 | 41 | 1.25152     |
| 42 | 2.210712 | 1000  | 42 | 0.774444 | 42 | 1.155011    |
| 43 | 2.184408 | 2.58  | 43 | 0.755639 | 43 | 1.141529    |
| 44 | 2.174863 | 802.8 | 44 | 0.730451 | 44 | 1.128123    |
| 45 | 2.174853 | 1000  | 45 | 0.728461 | 45 | 1.114793    |
| 46 | 2.126112 | 2.07  | 46 | 0.724221 | 46 | 1.091436    |
| 47 | 2.126112 | 13.57 | 47 | 0.696242 | 47 | 1.07526     |
| 48 | 2.067878 | 41.95 | 48 | 0.685654 | 48 | 1.063995    |
| 49 | 2.058681 | 3.02  | 49 | 0.680075 | 49 | 1.062235    |
| 50 | 2.009706 | 0.629 | 50 | 0.680075 | 50 | 1.036740014 |
| 51 | 2.009706 | 1.14  | 51 | 0.674744 | 51 | 1.036413    |
| 52 | 1.998282 | 1000  | 52 | 0.664708 | 52 | 1.023617    |
| 53 | 1.981598 | 5.02  | 53 | 0.664708 | 53 | 1.009672    |
| 54 | 1.951598 | 95.05 | 54 | 0.644067 | 54 | 0.98278954  |
| 55 | 1.94505  | 178   | 55 | 0.63386  | 55 | 0.960776    |
| 56 | 1.897027 | 1000  | 56 | 0.63386  | 56 | 0.936174    |
| 57 | 1.86128  | 16.37 | 57 | 0.626013 | 57 | 0.903261837 |
| 58 | 1.812878 | 1.27  | 58 | 0.613676 | 58 | 0.899841    |
| 59 | 1.7946   | 1000  | 59 | 0.613676 | 59 | 0.899841    |
| 60 | 1.77942  | 1000  | 60 | 0.603698 | 60 | 0.887882    |
| 61 | 1.777646 | 802.8 | 61 | 0.603698 | 61 | 0.876       |
| 62 | 1.763478 | 1000  | 62 | 0.601927 | 62 | 0.864193    |
| 63 | 1.719007 | 1000  | 63 | 0.583971 | 63 | 0.852463    |
| 64 | 1.661992 | 1000  | 64 | 0.579323 | 64 | 0.852463    |
| 65 | 1.608508 | 2.01  | 65 | 0.578028 | 65 | 0.829232    |
| 66 | 1.604258 | 10.55 | 66 | 0.574222 | 66 | 0.829232    |
| 67 | 1.58483  | 420.6 | 67 | 0.564548 | 67 | 0.81773     |
| 68 | 1.550826 | 881.6 | 68 | 0.554314 | 68 | 0.806305    |
| 69 | 1.51708  | 1000  | 69 | 0.530787 | 69 | 0.794956    |
| 70 | 1.394315 | 2.87  | 70 | 0.530787 | 70 | 0.794956    |
| 71 | 1.357694 | 1000  | 71 | 0.526618 | 71 | 0.783683    |
| 72 | 1.285037 | 49.5  | 72 | 0.508109 | 72 | 0.783683    |
| 73 | 1.259171 | 1.52  | 73 | 0.507447 | 73 | 0.774444    |
| 74 | 1.259171 | 1000  | 74 | 0.507447 | 74 | 0.772486    |
| 75 | 1.201875 | 1000  | 75 | 0.498969 | 75 | 0.772486    |
| 76 | 1.087472 | 486.1 | 76 | 0.489906 | 76 | 0.761365    |
| 77 | 1.00646  | 32.08 | 77 | 0.472007 | 77 | 0.750321    |
| 78 | 0.965261 | 22.04 | 78 | 0.472007 | 78 | 0.750321    |
| 79 | 0.954128 | 1000  | 79 | 0.472007 | 79 | 0.739353    |
| 80 | 0.856548 | 6.91  | 80 | 0.472007 | 80 | 0.728461    |
| 81 | 0.8418   | 508.6 | 81 | 0.472007 | 81 | 0.728461    |

|     |          |       |    |          |     |             |
|-----|----------|-------|----|----------|-----|-------------|
| 82  | 0.804254 | 1.99  | 82 | 0.453384 | 82  | 0.728461    |
| 83  | 0.804254 | 4.22  | 83 | 0.438544 | 83  | 0.717645    |
| 84  | 0.76495  | 0.847 | 84 | 0.437123 | 84  | 0.717645    |
| 85  | 0.726025 | 154.3 | 85 | 0.420139 | 85  | 0.717645    |
| 86  | 0.687479 | 1.41  | 86 | 0.415949 | 86  | 0.706905    |
| 87  | 0.649313 | 1.44  | 87 | 0.411761 | 87  | 0.706905    |
| 88  | 0.63236  | 7.18  | 88 | 0.393541 | 88  | 0.706905    |
| 89  | 0.630519 | 1000  | 89 | 0.37901  | 89  | 0.706905    |
| 90  | 0.549244 | 1000  | 90 | 0.371013 | 90  | 0.654349    |
| 91  | 0.537087 | 0.662 | 91 | 0.352632 | 91  | 0.62373     |
| 92  | 0.464166 | 3.61  | 92 | 0.277069 | 92  | 0.593796    |
| 93  | 0.462726 | 2.23  | 93 | 0.241901 | 93  | 0.593796    |
| 94  | 0.441766 | 470.9 | 94 | 0.241901 | 94  | 0.583971    |
| 95  | 0.392761 | 1.9   | 95 | 0.241901 | 95  | 0.578027518 |
| 96  | 0.266145 | 23.87 | 96 | 0.220984 | 96  | 0.574222    |
| 97  | 0.254501 | 3.67  | 97 | 0.079783 | 97  | 0.574222    |
| 98  | 0.122306 | 5.45  |    |          | 98  | 0.564548    |
| 99  | 0.058483 | 2.62  |    |          | 99  | 0.554314301 |
| 100 | 0.013119 | 126.4 |    |          | 100 | 0.535986    |
|     |          |       |    |          | 101 | 0.530787486 |
|     |          |       |    |          | 102 | 0.526618    |
|     |          |       |    |          | 103 | 0.507447    |
|     |          |       |    |          | 104 | 0.484293    |
|     |          |       |    |          | 105 | 0.484293    |
|     |          |       |    |          | 106 | 0.480918    |
|     |          |       |    |          | 107 | 0.463172    |
|     |          |       |    |          | 108 | 0.463172    |
|     |          |       |    |          | 109 | 0.438544    |
|     |          |       |    |          | 110 | 0.411761    |
|     |          |       |    |          | 111 | 0.411761    |
|     |          |       |    |          | 112 | 0.403459    |
|     |          |       |    |          | 113 | 0.395233    |
|     |          |       |    |          | 114 | 0.395233    |
|     |          |       |    |          | 115 | 0.395233    |
|     |          |       |    |          | 116 | 0.393541    |
|     |          |       |    |          | 117 | 0.37901     |
|     |          |       |    |          | 118 | 0.371319    |
|     |          |       |    |          | 119 | 0.371013    |
|     |          |       |    |          | 120 | 0.371013    |
|     |          |       |    |          | 121 | 0.371013    |
|     |          |       |    |          | 122 | 0.347479    |
|     |          |       |    |          | 123 | 0.347479    |
|     |          |       |    |          | 124 | 0.327434205 |
|     |          |       |    |          | 125 | 0.309779    |

126 0.28099  
 127 0.240092  
 128 0.220984  
 129 0.159351

The vasorin level higher than cut-off value (1.5061ng/ml) was labeled in red; The AFP level under 5.8TU was considered to be negative.

**Supplementary results Table 3:** The immunofluorescence result of 7 cases liver tissues

| Diseases        | Cases |   |    |     |      | Total |
|-----------------|-------|---|----|-----|------|-------|
|                 | -     | + | ++ | +++ | ++++ |       |
| HCC             |       | 1 | 0  | 2   | 1    | 4     |
| hepatitis       | 1     | 1 | 0  | 0   | 0    | 2     |
| hepatocirrhosis | 1     | 0 | 0  | 0   | 0    | 1     |

-: <5% of cells stained; +: 5%-25% of cells stained; ++: 26%–50% of cells stained; +++: 51%–75% of cells stained; ++++: >75% of cells stained.

**Supplementary results Table 4:** Random ssDNA library and primers were used in the experiments.

| Name           | Sequence                                                          |
|----------------|-------------------------------------------------------------------|
| GP35           | 5'-G CAATGGTACGGTACTTCC-N35-CAAAAGTGCACGCTACTTTGCTAA-3'           |
| Plong-1        | 5' - GCAATGGTACGGTACTTCC-3'                                       |
| P11            | 5'- TTAGCAAAGTAGCGTGCACCTTTTG-3'                                  |
| Pstem-loop     | 5'- GCTAAGCGGGTGGGACTTCCTAGTCCCACCCGCTTAGCAAAGTAGCGTGCACCTTTTG-3' |
| qPCR-Vasorin-F | 5'- GCTCAAGCTGCAGGACAAC-3'                                        |

|                 |                                    |
|-----------------|------------------------------------|
| qPCR-Vasorin-R  | 5'- GAAGAGCCCCTCGTCCAG-3'          |
| qPCR-β-actin-F  | 5'- GGCATCGTGATGGACTCCG-3'         |
| qPCR-β-actin-R  | 5'- GCTGGAAGGTGGACAGCGA-3'         |
| miR145-F        | 5'- GTCCAGTTTTCCCAGGAATCCCT-3'     |
| miR145-R        | 5'- GCGAGCACAGAATTAATACGAC-3'      |
| miR146a-F       | 5'- GCTGAGAACTGAATTCCATG -3'       |
| miR146a-R       | 5'- GCGAGCACAGAATTAATACGAC-3'      |
| miR146b-F       | 5'- CGGCGTGAGAACTGAATTCCAT-3'      |
| miR146b-R       | 5'- GCGAGCACAGAATTAATACGAC-3'      |
| miR205-F        | 5'- TCCTTCATTCCACCGGAGTCTG -3'     |
| miR205-R        | 5'- GCGAGCACAGAATTAATACGAC -3'     |
| miR214-F        | 5'- ACAGCAGGCACAGACAGGCAGT -3'     |
| miR214 -R       | 5'- GCGAGCACAGAATTAATACGAC-3'      |
| miR761-F        | 5'- CGGCAGCAGGGTGAAACTG -3'        |
| miR761-R        | 5'- GCGAGCACAGAATTAATACGAC-3'      |
| miR3619-F       | 5'- TCTCAGCAGGCAGGCTGGT -3'        |
| miR3619-R       | 5'- GCGAGCACAGAATTAATACGAC -3'     |
| FL-VASN-F       | 5'- GCTCAAGCTGCAGGACAAC-3'         |
| FL-VASN-R       | 5'-GAAGAGCCCCTCGTCCAG -3'          |
| VASN 3'UTR-F    | 5'- TGCTCTAGAGCCAGAGAGAGACAGG-3'   |
| VASN 3'UTR-R    | 5'- CCGGAATTCAAACACACTTCATCTT-3'   |
| VASN-145-1 mu F | 5'- TGCTCTAGA GCCAGAGAGAGACAGG -3' |

|                 |                                           |
|-----------------|-------------------------------------------|
| VASN-145 1 mu R | 5'- TAAAGCATCTTCCTTTCTTTTGTTCCTTCGC-3'    |
| VASN-145-2 mu F | 5'- CGAA GGAACAAAAG AAAGGAAGATGCTTTAG -3' |
| VASN-145-2 mu R | 5'- CCGGAATTC AAACACACTTCATCTT -3'        |
| VASN-146a mu F  | 5'- TGCTCTAGAAGTCCCAACCTCGGGG-3'          |
| VASN-146a mu R  | 5'- CCGGAATTC AAACACACTTCATCTT -3'        |

**Supplementary results Table 5:** The detailed conditions for each round of subtractive EMSA-SELEX selection.

| Round | ssDNA pool<br>(pmol) | AFP negative serum<br>( $\mu$ l) | Normal serum<br>( $\mu$ l) | PCR cycle | Subtractive Incubated<br>time (h) | Incubated<br>time (h) |
|-------|----------------------|----------------------------------|----------------------------|-----------|-----------------------------------|-----------------------|
| 1     | 1500                 | 5                                | 5                          | 35        | 1                                 | 1                     |
| 2     | 300                  | 5                                | 5                          | 35        | 1                                 | 1                     |
| 3     | 120                  | 5                                | 5                          | 35        | 1                                 | 1                     |
| 4     | 120                  | 5                                | 5                          | 30        | 1                                 | 1                     |
| 5     | 120                  | 5                                | 5                          | 30        | 1                                 | 1                     |
